# Supplementary material for: Tyrosine phosphorylation of lamin A by Src promotes disassembly of nuclear lamina in interphase
Source: PubMed Central journal article supplement (PMC8362257; doi:10.26508/lsa.202101120), 2021-08-12

A

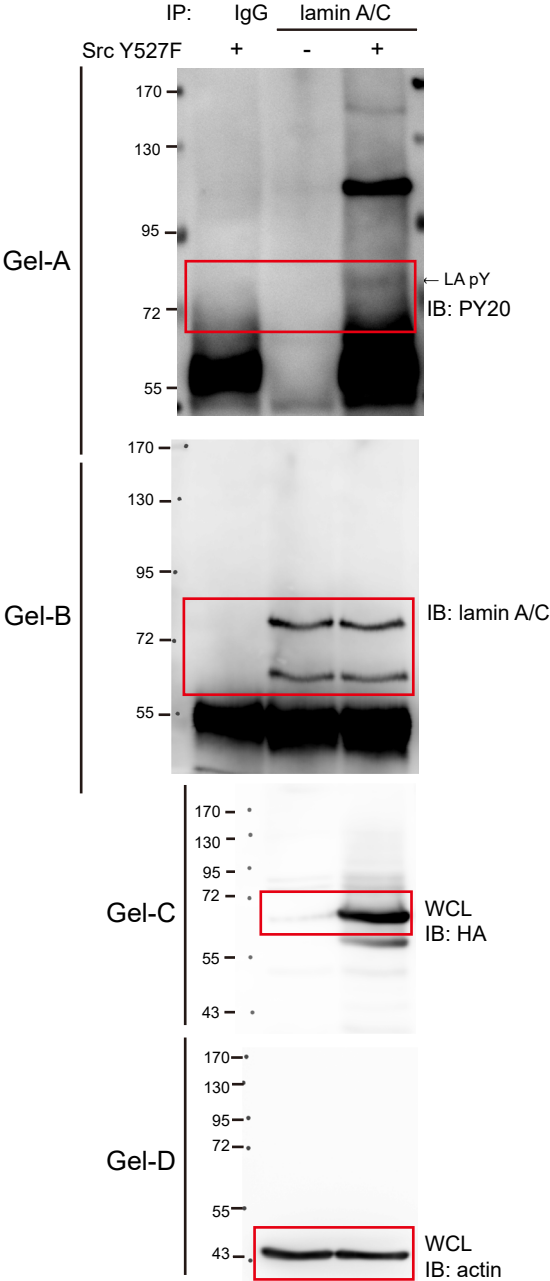

Source Data

Figure 2

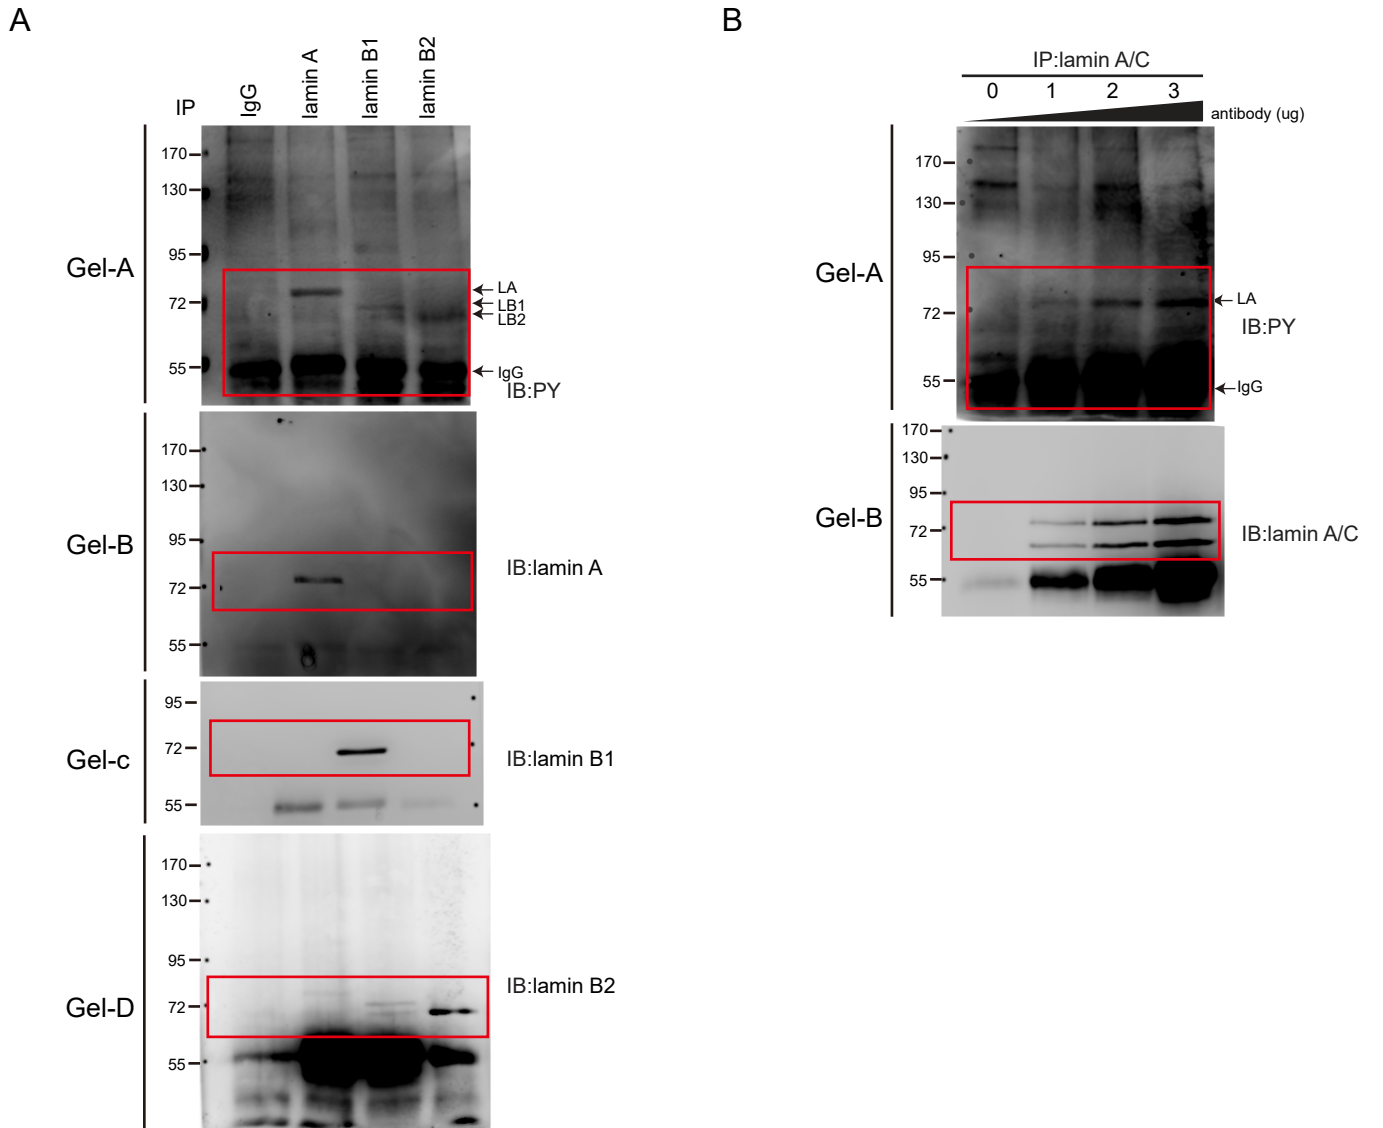

Source Data

Figure 2

C

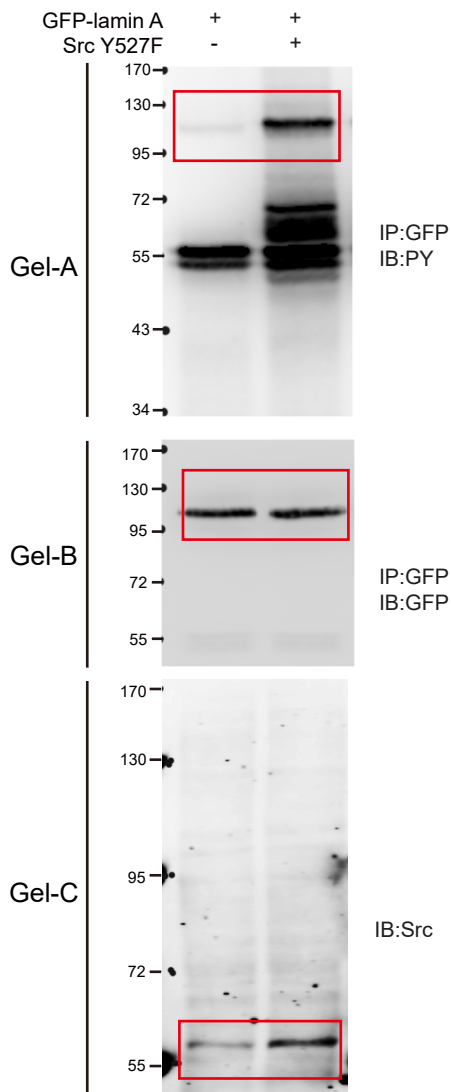

E

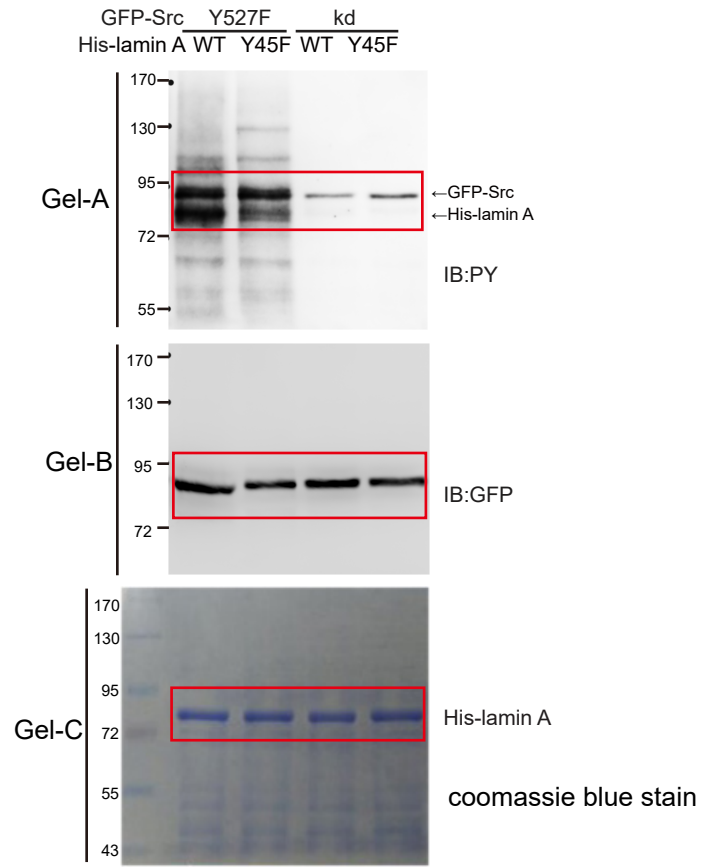

Source Data

Figure 2

F

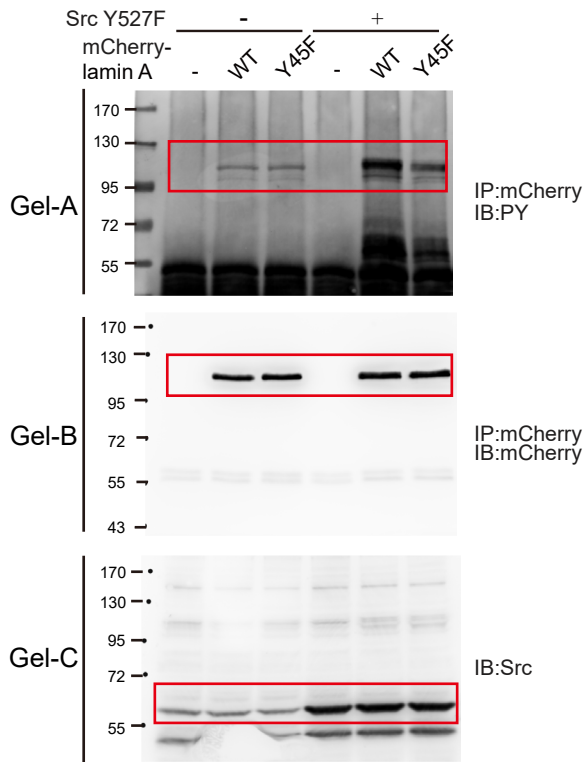

G

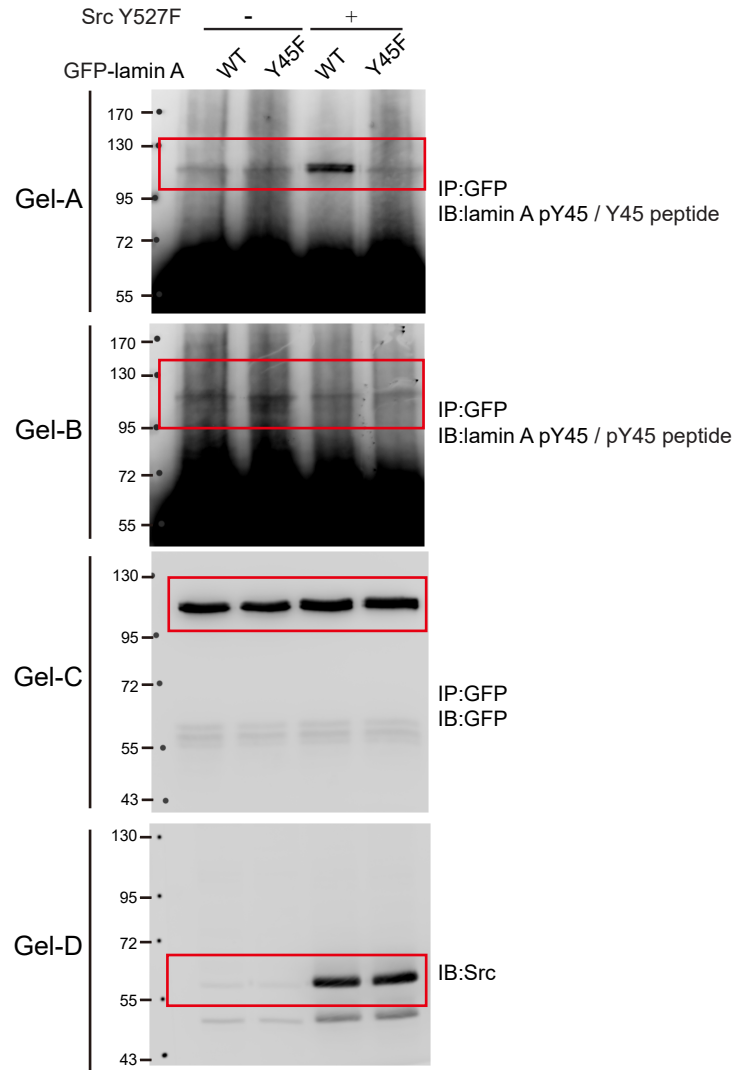

Source Data

Figure 2

H

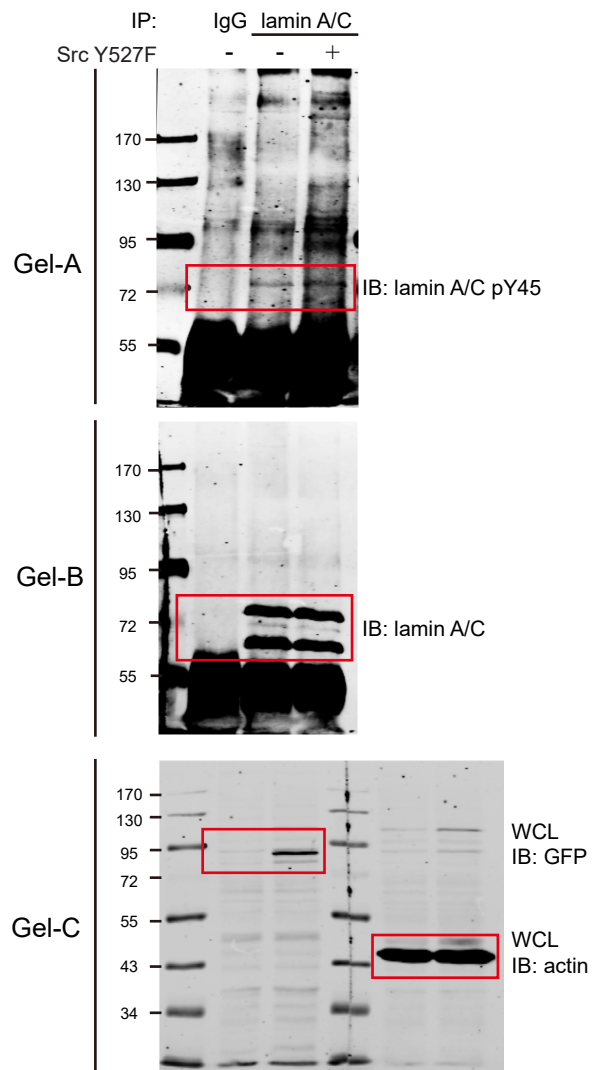

Source Data

Figure 3

A

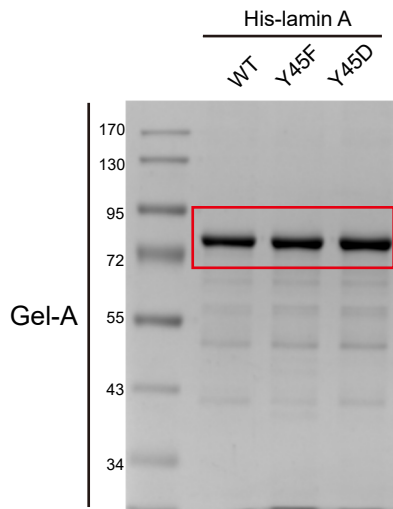

B

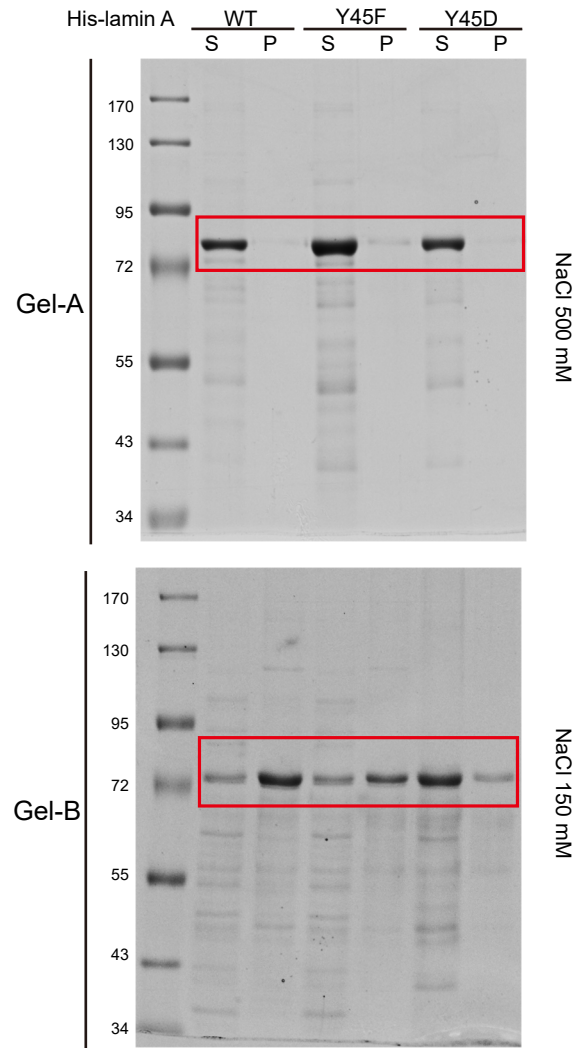

Source Data

Figure 3

C

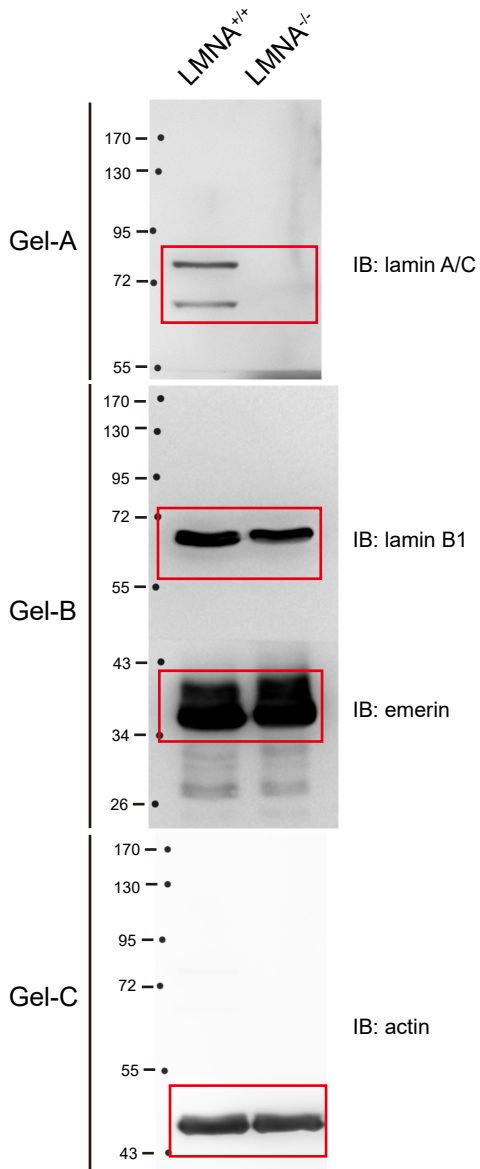

I

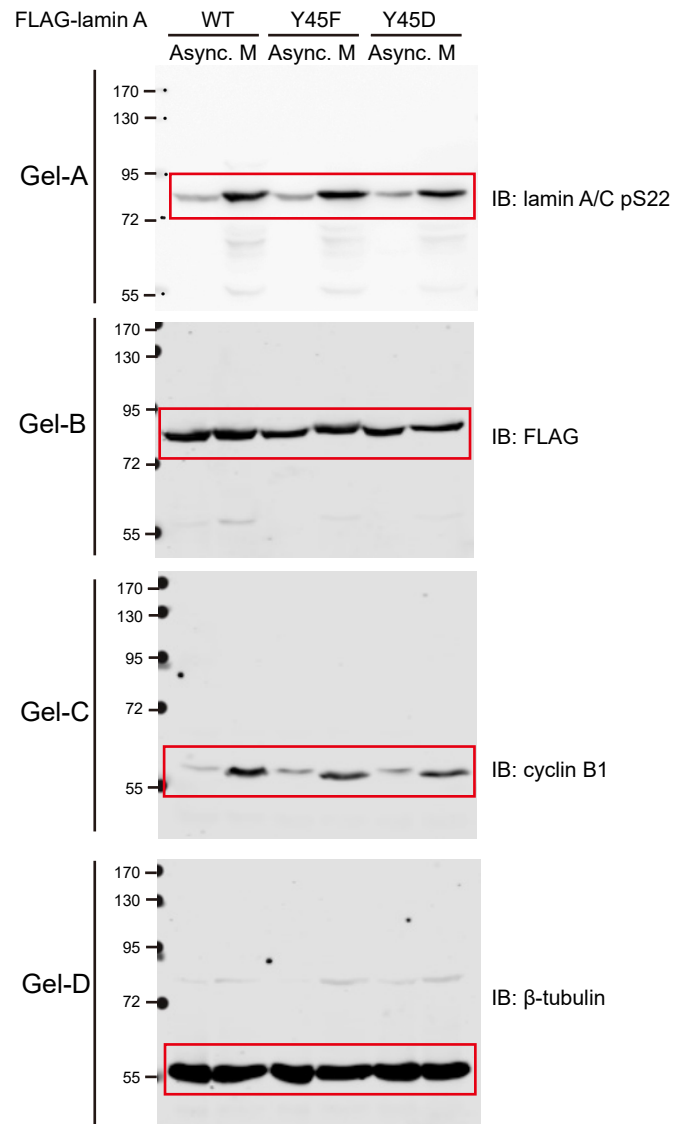

Source Data

Figure 3

J

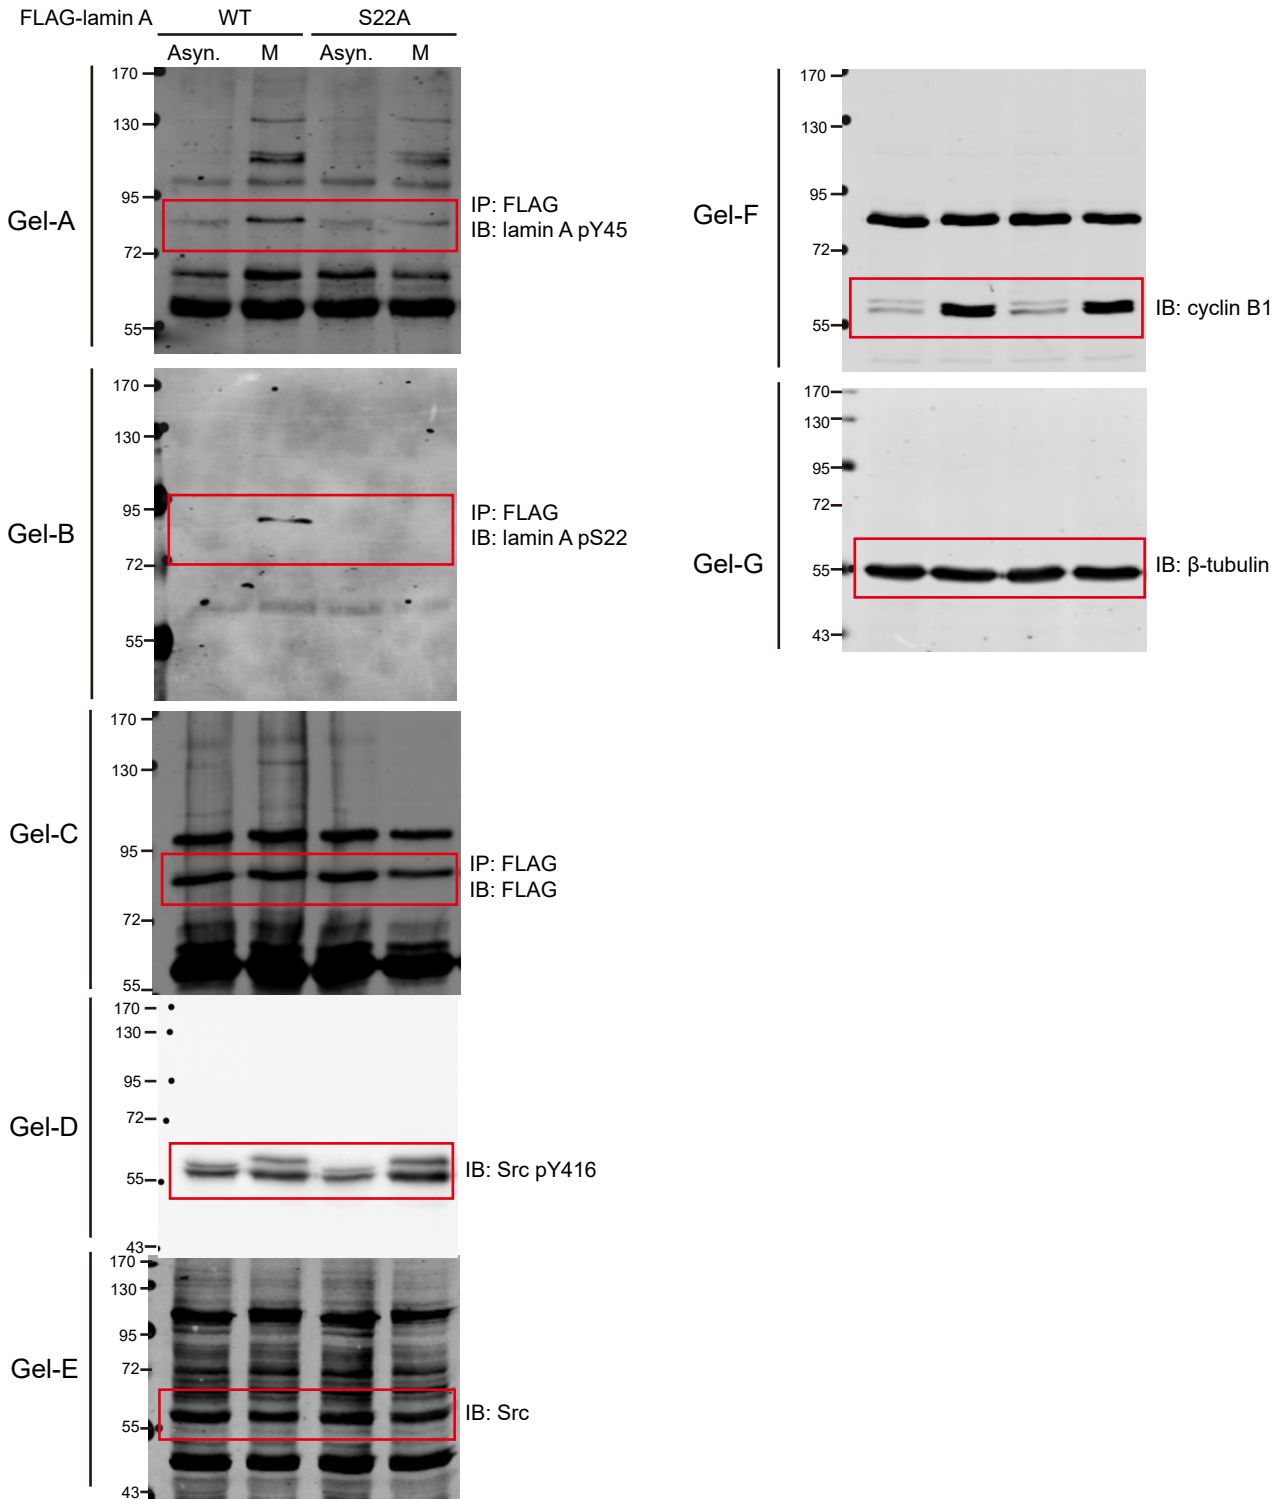



Source Data

Figure 5

A

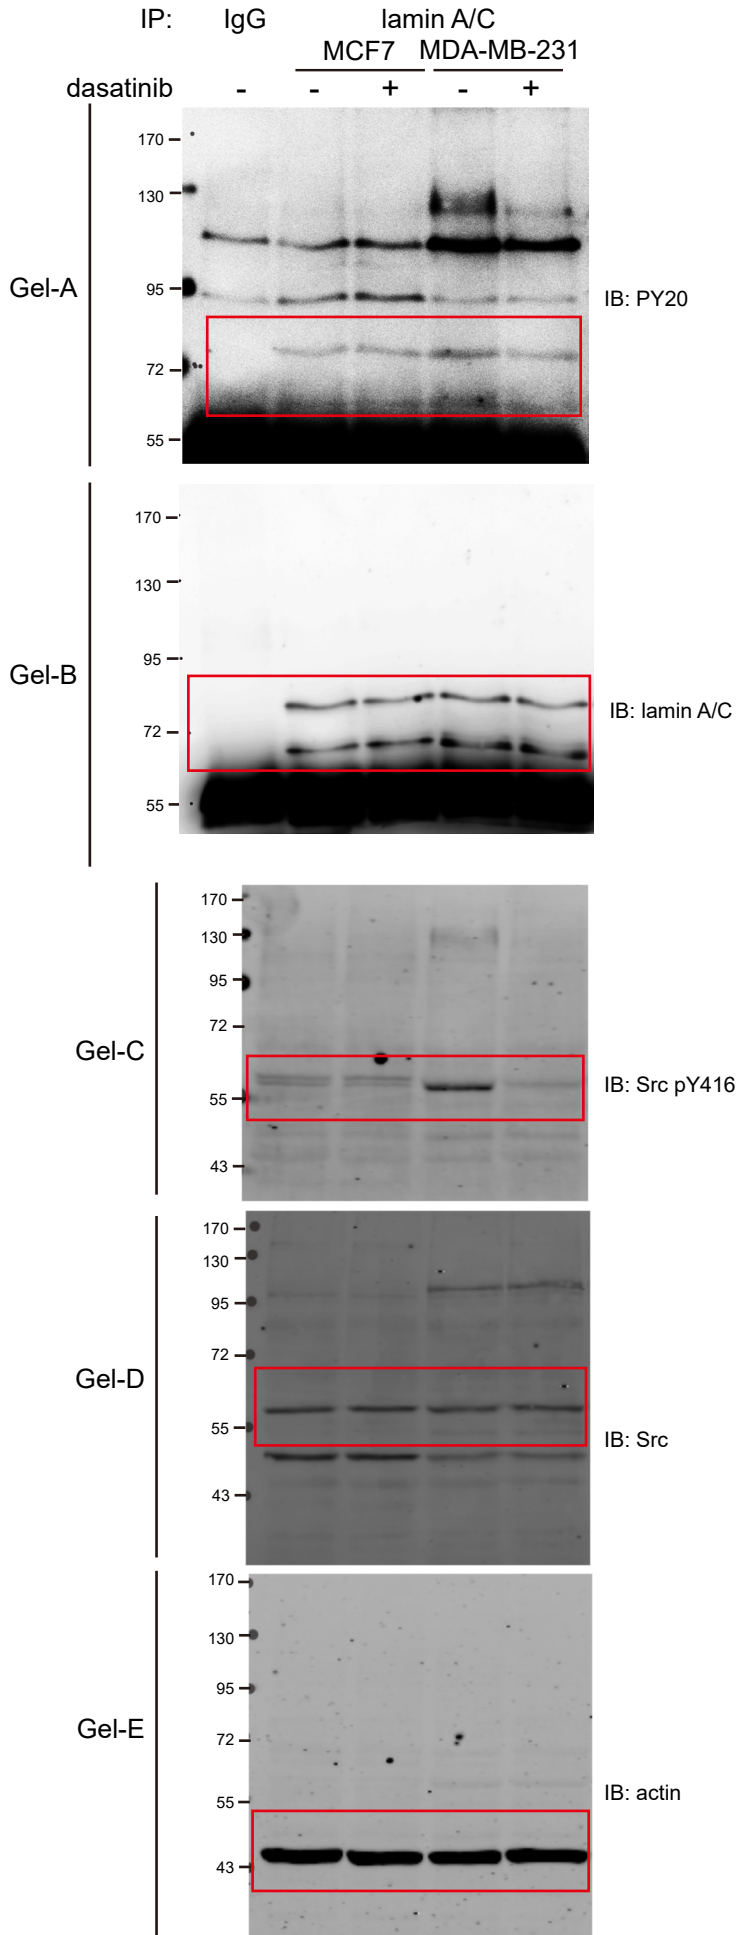

C

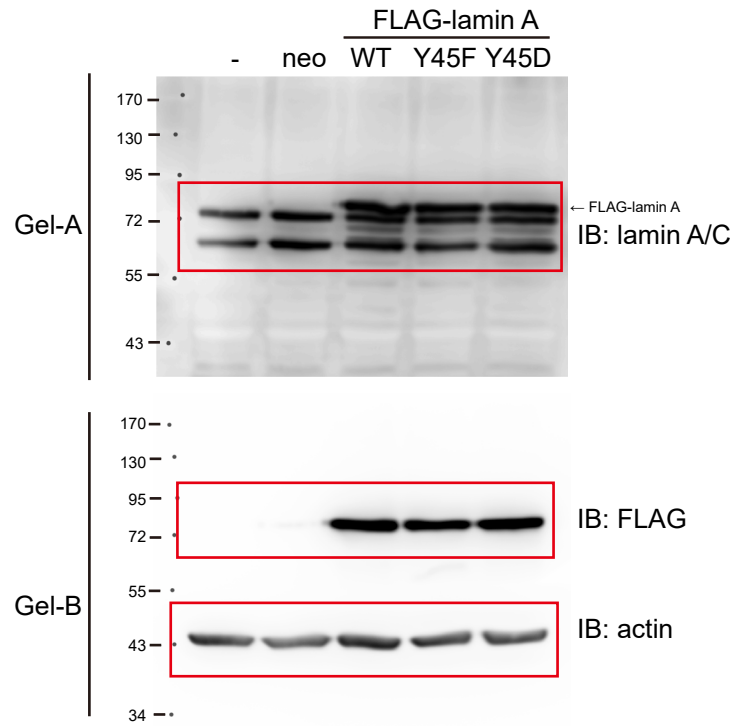

Source Data

Figure 7

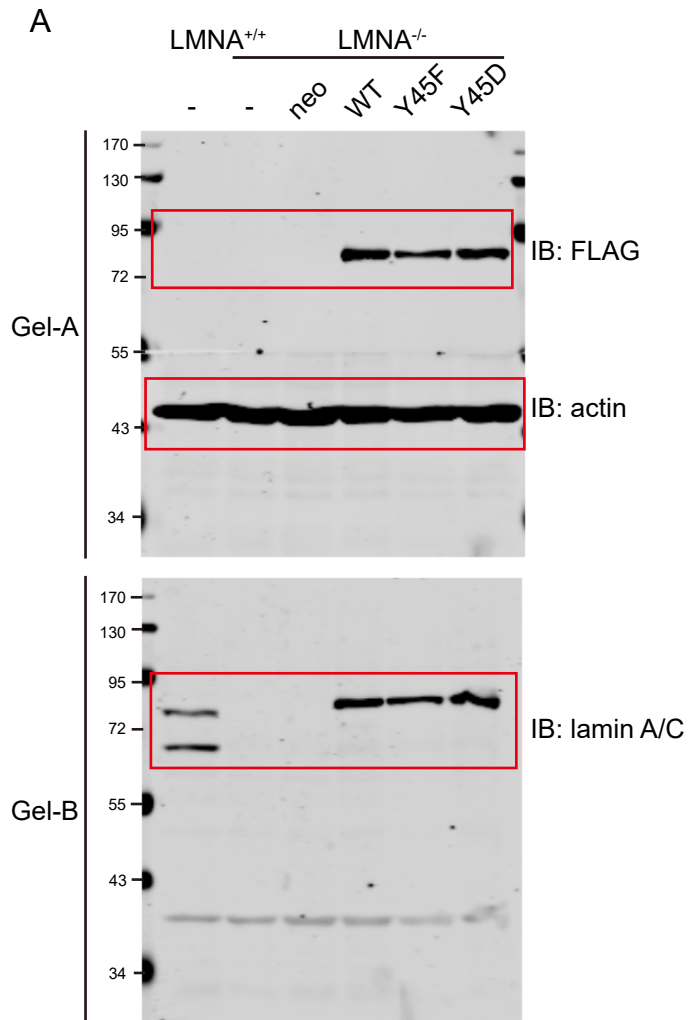

Supplement: LSA-2021-01120_SdataF1_F2_F3_F5_F7.pdf [file LSA-2021-01120_SdataF1_F2_F3_F5_F7.pdf]
